# Supplementary material
Source: PubMed Central journal article supplement (PMC5413917)
Supplement: rspb20162469supp1.pdf [file rspb20162469supp1.pdf]

Supplementary Material for

**Mutualistic cleaner fish maintains high escape performance despite privileged relationship with predators**

Gingins S, Roche DG and Bshary R. (2017)

*Proceeding of the Royal Society B: Biological Sciences*

**Figure S1.** Body size (total length in cm) of all individuals tested. Red = adults; Blue = juveniles. Species names are abbreviated (see Fig. 1 for full names).

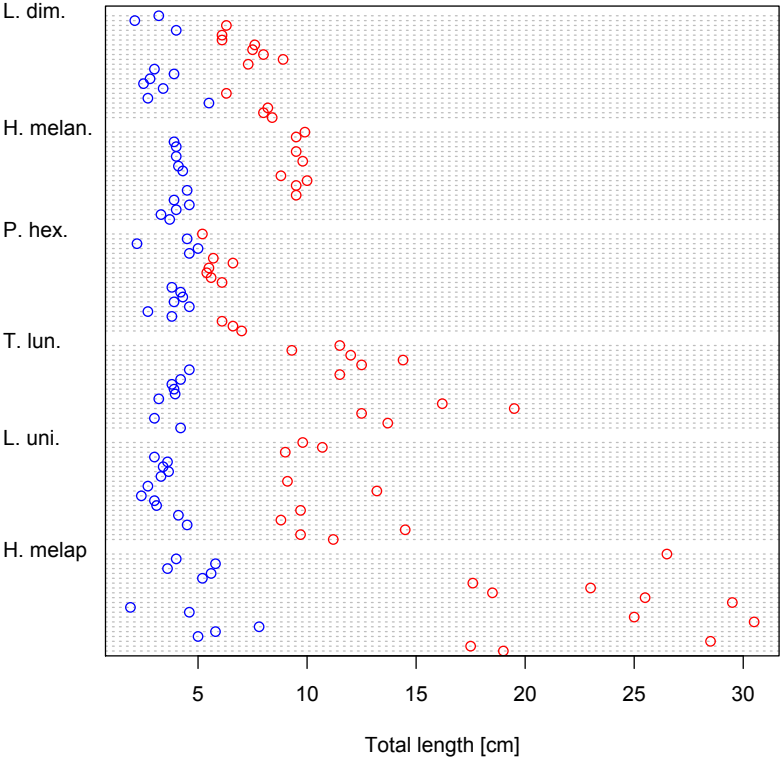

**Figure S2.** Performance of the six study species: maximum velocity ( $U_{max}$ ; plots 1-2) and maximum acceleration ( $A_{max}$ ; plots 3-4). Plots display the mean and 95% confidence interval (C.I.) predicted by the linear mixed-effects models for adults (left column) and juveniles (right column). The obligate cleaner (*L. dimidiatus*) is displayed in green; facultative cleaners, appear in red and non-cleaners, in black. Different letters indicate that the C.I. do not overlap for more than half of the error bar length, and thus represent significant differences below  $\alpha = 0.05$  [1]. Plots were created with the R package “effects” [2]. Species names are abbreviated (see Fig. 1 for full names).

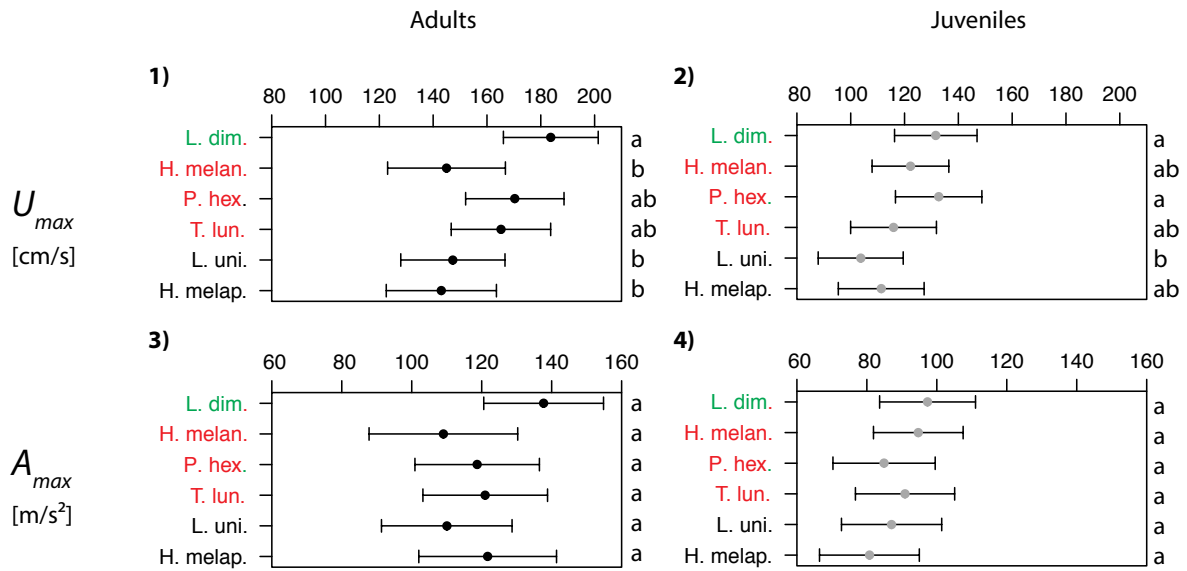

**Table S1.** Results from the linear mixed-effects models with maximum velocity ( $U_{\max}$ ; a) and maximum acceleration ( $A_{\max}$ ; b) as response variables, for adult and juvenile fishes.

| Response      | Predictor   | d.f. | Adults  |      |                         | Juveniles |      |                          |
|---------------|-------------|------|---------|------|-------------------------|-----------|------|--------------------------|
|               |             |      | Sum Sq. | F    | P-value                 | Sum Sq.   | F    | P-value                  |
| 1) $U_{\max}$ | sin(Angle)  | 1    | 818     | 0.45 | 0.504                   | 2365      | 3.73 | 5.64 e <sup>-2</sup>     |
|               | Dist. stim. | 1    | 194     | 0.11 | 0.745                   | 10519     | 16.6 | 1.02 e <sup>-4</sup> *** |
|               | Trial       | 1    | 52      | 0.03 | 0.866                   | 991       | 1.56 | 0.219                    |
|               | Observer    | 1    | 942     | 0.52 | 0.474                   | 979       | 1.54 | 0.219                    |
|               | Species     | 5    | 32011   | 3.51 | 5.01 e <sup>-3</sup> ** | 8378      | 2.64 | 3.65 e <sup>-2</sup> *   |
| 2) $A_{\max}$ | sin(Angle)  | 1    | 681     | 0.47 | 0.496                   | 650       | 1.14 | 0.288                    |
|               | Dist. stim. | 1    | 793     | 0.54 | 0.462                   | 7513      | 12.3 | 6.84 e <sup>-4</sup> *** |
|               | Trial       | 1    | 6365    | 4.36 | 0.038 *                 | 349       | 0.57 | 0.451                    |
|               | Observer    | 1    | 37.8    | 0.03 | 0.873                   | 190       | 0.31 | 0.579                    |
|               | Species     | 5    | 11256   | 1.54 | 0.192                   | 3138      | 1.03 | 0.413                    |

d.f., degrees of freedom ; Sum Sq., Sum of Squares; \* $P < 0.05$ ; \*\* $P < 0.01$ ; \*\*\* $P < 0.001$

**Table S2.** Proportion of time that each species spent inside the reef matrix over two hours of field observations.

| Species               | % time in reef | std   | Min | Max   | Pairwise comparisons |
|-----------------------|----------------|-------|-----|-------|----------------------|
| <i>L. dimidiatus</i>  | 0.004          | 0.012 | 0   | 0.033 | b                    |
| <i>H. melanurus</i>   | 0.025          | 0.050 | 0   | 0.133 | b                    |
| <i>P. hexataenia</i>  | 0.212          | 0.215 | 0   | 0.633 | a                    |
| <i>T. lunare</i>      | 0.000          | 0.000 | 0   | 0.000 | b                    |
| <i>L. unilineatus</i> | 0.008          | 0.024 | 0   | 0.067 | b                    |
| <i>H. melapterus</i>  | 0.021          | 0.059 | 0   | 0.167 | b                    |

std., standard deviation; Min, Minimum; Max, Maximum; different letters indicate significant differences across species ( $\alpha = 0.05$ ).

## Supplementary analyses controlling for body size

We used two approaches to assess whether differences in body size affect the results we present in the manuscript: 1) we included size as a covariate in the model and 2) we divided  $D_{esc}$ ,  $D_{esc-stim}$ ,  $U_{max}$  and  $A_{max}$  by the size of the individual to obtain relative (rather than absolute) performance measures and re-ran the analyses. The second approach is commonly used to control for size in fast-start performance analyses [3].

These analyses can be reproduced using the archived code, including the diagnostic plots used to assess model fit and the effect plots to visualize model predictions. The table below summarizes the output of each analysis.

| Adults                              |                      |                          | Juveniles         |                      |                          |
|-------------------------------------|----------------------|--------------------------|-------------------|----------------------|--------------------------|
| Original analysis                   | Size as fixed effect | Size corrected variables | Original analysis | Size as fixed effect | Size corrected variables |
| <b>1) Latency</b>                   |                      |                          |                   |                      |                          |
| Dist. Stim ***                      | Dist. Stim. ***      | --                       | Dist. Stim. ***   | Dist. Stim. ***      | --                       |
| Species ***                         | TL **                | --                       | Species ***       | Species *            | --                       |
| <b>2) Turning Rate</b>              |                      |                          |                   |                      |                          |
| Species ***                         | Species ***          | --                       | Dist. Stim. ***   | Dist. Stim. ***      | --                       |
|                                     | TL **                | --                       | Species **        | Species **           | --                       |
|                                     |                      |                          |                   | TL ***               | --                       |
| <b>3) <math>D_{esc}</math></b>      |                      |                          |                   |                      |                          |
| Species ***                         | Species ***          | Species ***              | Dist. Stim. ***   | Dist. Stim. ***      | Dist. Stim. *            |
| <b>4) <math>D_{esc-stim}</math></b> |                      |                          |                   |                      |                          |
| Dist. Stim ***                      | Dist. Stim. ***      | Dist. Stim. ***          | Dist. Stim ***    | Dist. Stim. ***      | Dist. Stim. ***          |
| Species **                          | Species ***          | Species ***              | Species **        | Species **           | Species ***              |
|                                     |                      |                          |                   |                      | Angle *                  |
| <b>5) <math>U_{max}</math></b>      |                      |                          |                   |                      |                          |
| Species **                          | Species *            | Species ***              | Species *         | Species *            | Species **               |
|                                     |                      |                          | Dist. Stim. ***   | Dist. Stim ***       | Dist. Stim. ***          |
|                                     |                      |                          |                   | Angle *              | Angle *                  |
| <b>6) <math>A_{max}</math></b>      |                      |                          |                   |                      |                          |
| Video *                             | Video *              | Video *                  | Dist. Stim ***    | Dist. Stim. ***      | Dist. Stim. **           |
|                                     |                      | Species ***              |                   |                      | Species *                |

Dist. Stim. = Distance to Stimulus; TL = Total Length; Angle = Angle to Stimulus. In each analysis (Original, Size as fixed effect, Size corrected variables) and for each variable, the table indicates which predictor came out as significant.  $P < 0.05$ ; \*\* $P < 0.01$ ; \*\*\* $P < 0.001$ .

### *Including size as a covariate*

Including size as a covariate in the model qualitatively changed the results only for escape latency in adults. In this case, size (but not species) was as a significant predictor in the models ran on all six response variables. Size was also a significant predictor of turning rate in both adults and juveniles but so was species. The trend we observed in the effect plots suggests that including size as a covariate generally decreased differences among species. This result was expected because size and species are collinear in our dataset; hence the variance will be distributed between these two predictors. The issue of collinearity was confirmed by the fact that the VIFs (Variance Inflation Factor, a measure of collinearity) reached higher values in this second analysis versus the one presented in the main text. In our original analysis, VIFs never reached values above 1.91; however, in this analysis, VIFs for species and size regularly reached values above 6 (max = 7.76). Therefore, we believe that this supplementary analysis is not statistically sound.

### *Adjusting response variables for size*

In this case, the main effect of species was never affected by transforming any of the six response variables. Furthermore, the effect plots suggest that the differences we observed in our original analysis are even more pronounced when we consider relative measures of escape performance. This is sensible since the two smallest species were already the best performers in absolute terms, and relating performance to body length puts the smallest individuals at an advantage, thus increasing the patterns already observed. Nevertheless, we focus on absolute performance in the main text because we are interested in how far a fish can escape from a threat, irrespective of its size.

## **References**

1. Cumming, G., Fidler, F. & Vaux, D. L. 2007 Error bars in experimental biology. *J. Cell Biol.* **177**, 7–11.
2. Fox, J. 2003 Effect displays in R for generalised linear models. *J. Stat. Softw.* **8**, 1–27.
3. Domenici, P. & Blake, R. 1997 The kinematics and performance of fish fast-start swimming. *J. Exp. Biol.* **200**, 1165–1178.
